# Supplementary material
Source: PubMed Central journal article supplement (PMC3494905)
Supplement: 1208605109_pnas.201208605SI.pdf [file 1208605109_pnas.201208605SI.pdf]

# Supporting Information

Thorgersen et al. 10.1073/pnas.1208605109

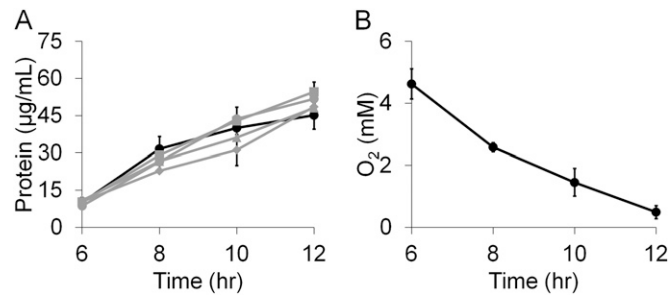

**Fig. 51.** Exposure of *P. furiosus* cultures to O<sub>2</sub> (0.8–4.9 mM) after 6 h of growth does not significantly impair growth. Cultures (40 mL) in 100-mL bottles were grown at 95 °C in medium containing 5 g/L maltose, 0.5 g/L yeast extract, and no sulfide on a shaking platform (150 rpm). Cultures were exposed to a range of O<sub>2</sub> concentrations (0.8–4.9 mM) after 6 h of growth. (A) Growth was monitored using total cell protein. (B) Total O<sub>2</sub> measured over time in cultures exposed to 4.9 mM O<sub>2</sub>.

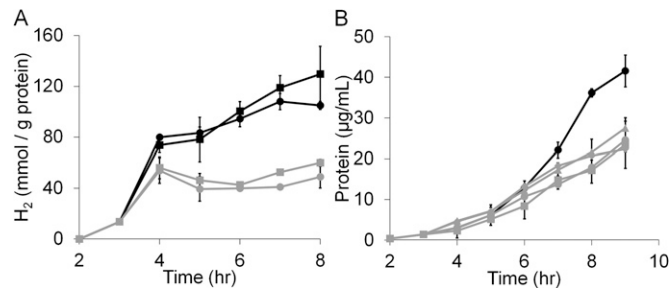

**Fig. 52.** H<sub>2</sub> recycling does not play a major role in O<sub>2</sub> detoxification in *P. furiosus*. Cultures (40 mL) in 100-mL bottles were grown at 95 °C in medium containing 5 g/L maltose, 0.5 g/L yeast extract, and no sulfide on a shaking platform (150 rpm). Growth was monitored by total cell protein. (A) Specific H<sub>2</sub> production. Cultures of COM1c2 (circles) and SHI SHIc (squares) were grown anoxically (black) or were exposed to 8% O<sub>2</sub> (vol/vol in headspace) after 4 h of growth (gray). Specific hydrogen production values are reported. (B) Cultures of COM1c2 were grown anoxically (black) or were exposed to 8% O<sub>2</sub> (vol/vol in headspace) after 4 h of growth (gray) with 0% H<sub>2</sub> (circles), 5% H<sub>2</sub> (squares), 10% H<sub>2</sub> (triangles), or 15% H<sub>2</sub> (diamonds) added.
